# Supplementary material for: Hypothyroidism has a protective causal association with hepatocellular carcinoma: A two-sample Mendelian randomization study
Source: PubMed Central journal article supplement (PMC9562779; doi:10.3389/fendo.2022.987401), 2022-09-30

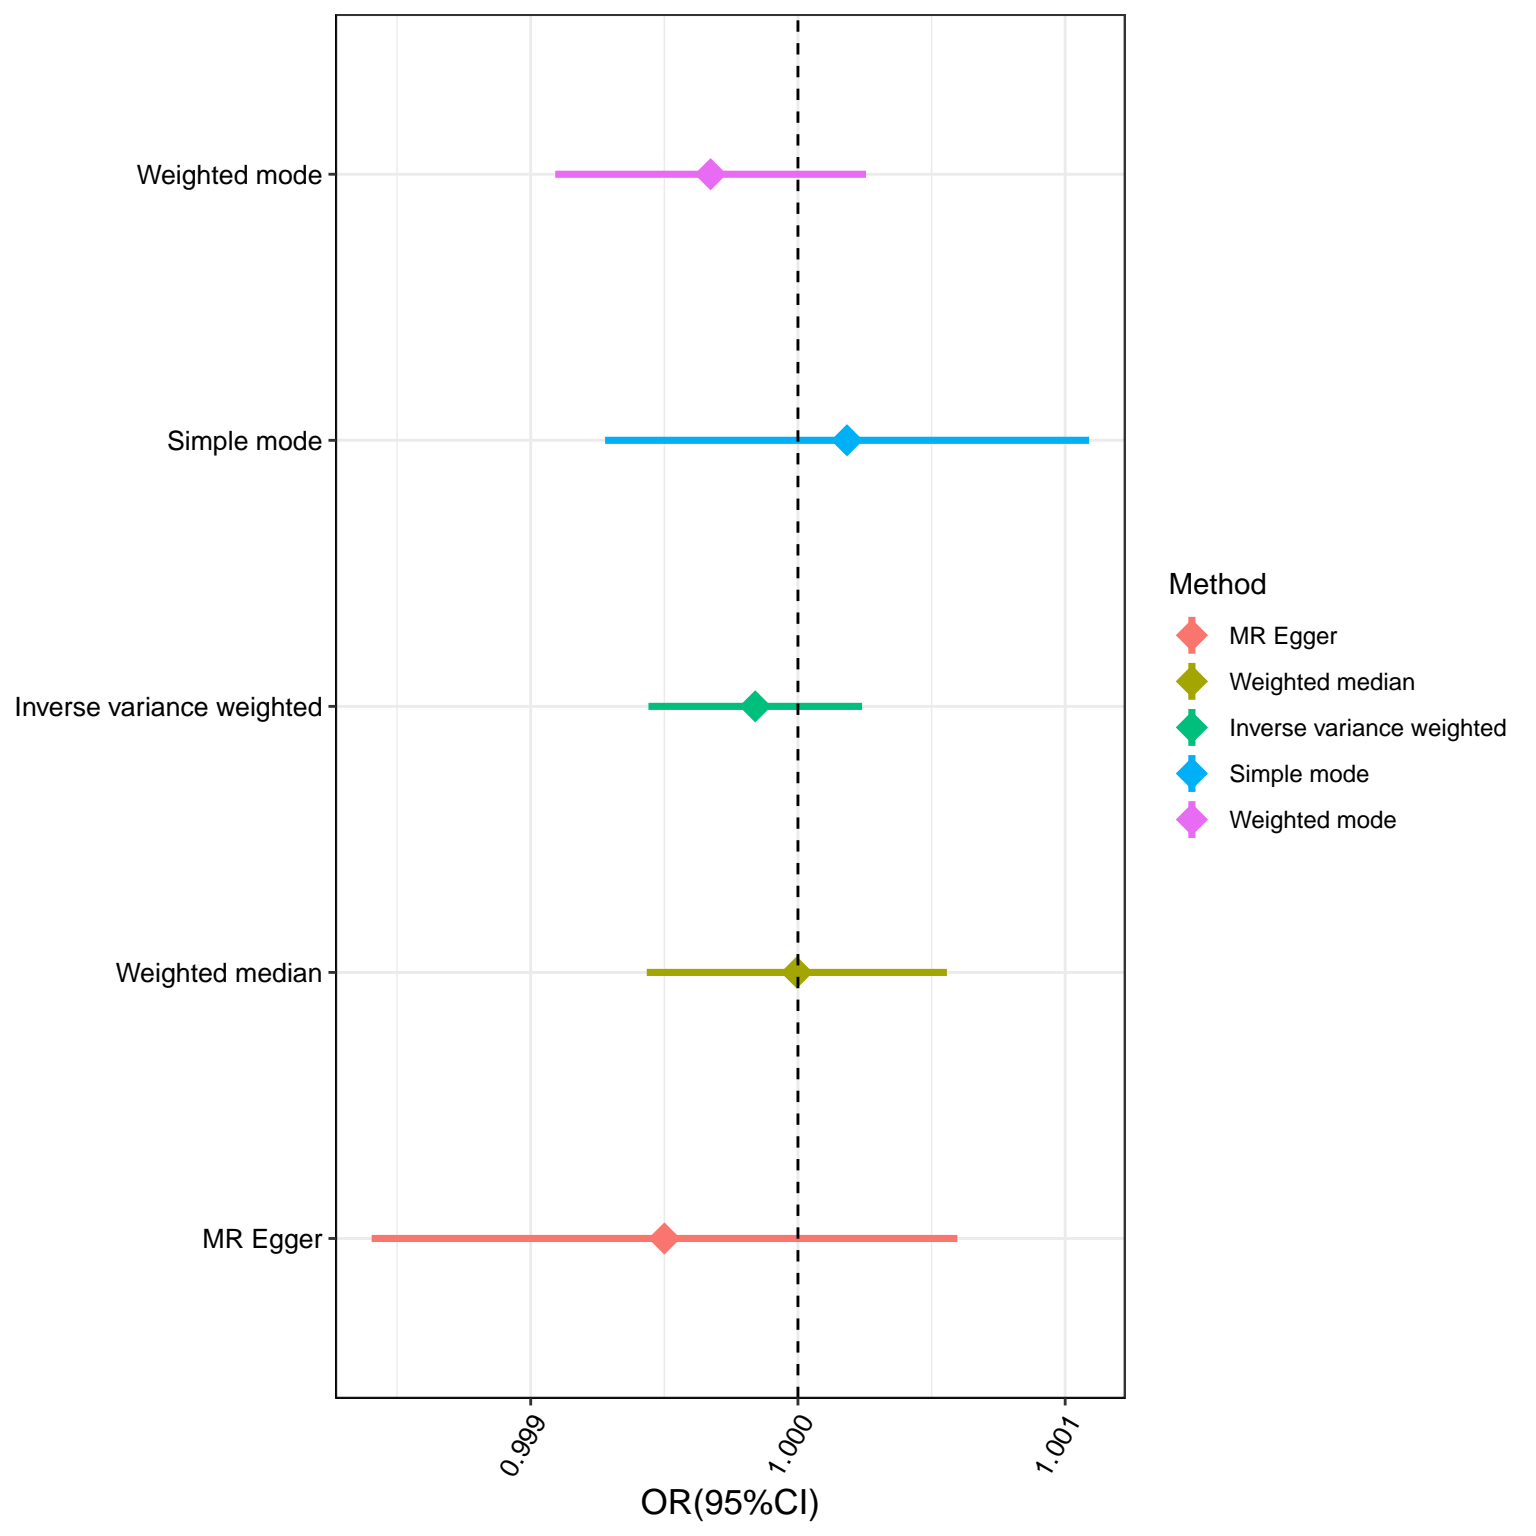

Supplement: DataSheet_3.pdf [file DataSheet_3.pdf]
