# Supplementary material for: Hypothyroidism has a protective causal association with hepatocellular carcinoma: A two-sample Mendelian randomization study
Source: PubMed Central journal article supplement (PMC9562779; doi:10.3389/fendo.2022.987401), 2022-09-30
Supplement: DataSheet_4.pdf [file DataSheet_4.pdf]

Table S1. SNPs associated with hypothyroidism

| SNP         | chr | effect allele | other allele | P-value   | beta ( $\beta$ ) | se          | EAF      | R <sup>2</sup> | F-statistic  |
|-------------|-----|---------------|--------------|-----------|------------------|-------------|----------|----------------|--------------|
| rs10036386  | 5   | T             | C            | 1.75E-09  | 0.0032141        | 0.00053396  | 0.381915 | 0.010366001    | 43.58938376  |
| rs1032129   | 8   | C             | A            | 2.67E-08  | -0.00302426      | 0.000543772 | 0.35438  | -0.009577811   | 39.47940305  |
| rs10424978  | 19  | A             | C            | 7.21E-15  | -0.0041633       | 0.00053505  | 0.59984  | -0.01339949    | 55.02393889  |
| rs1045853   | 14  | C             | A            | 1.1E-09   | -0.00337461      | 0.000553686 | 0.656897 | -0.010495908   | 43.22445985  |
| rs1088898   | 17  | T             | G            | 4.22E-08  | 0.00338586       | 0.00061771  | 0.768046 | 0.009439499    | 39.65628429  |
| rs10956412  | 8   | C             | A            | 5.84E-13  | -0.00508727      | 0.000706129 | 0.163144 | -0.012406556   | 50.99650059  |
| rs111618453 | 13  | A             | G            | 4.33E-23  | 0.00577379       | 0.000583397 | 0.272172 | 0.017041885    | 72.14840199  |
| rs11258303  | 10  | A             | C            | 5.59E-10  | 0.00371265       | 0.000598646 | 0.746995 | 0.010680045    | 44.92420452  |
| rs11571297  | 2   | C             | T            | 5.34E-61  | -0.00859242      | 0.000521363 | 0.4907   | -0.028371633   | 114.8096385  |
| rs11675342  | 2   | T             | C            | 1.67E-18  | 0.00461109       | 0.000525295 | 0.422209 | 0.015115921    | 63.86951288  |
| rs11706511  | 3   | G             | A            | 2.47E-09  | 0.00465932       | 0.000781286 | 0.126089 | 0.010270072    | 43.18181572  |
| rs11783023  | 8   | T             | C            | 1.06E-08  | -0.00329795      | 0.000576457 | 0.720606 | -0.009852353   | 40.6000155   |
| rs12582330  | 12  | T             | G            | 1.1E-12   | -0.00416475      | 0.00058512  | 0.728871 | -0.012257313   | 50.39047527  |
| rs12980063  | 19  | G             | A            | 1.74E-10  | -0.00339664      | 0.000532123 | 0.391004 | -0.010992467   | 45.24716149  |
| rs13090803  | 3   | T             | G            | 2.09E-15  | 0.0050706        | 0.00063893  | 0.212032 | 0.013666252    | 57.65933508  |
| rs13145888  | 4   | C             | T            | 2.45E-21  | -0.00601133      | 0.000633817 | 0.212492 | -0.016331748   | 66.87153284  |
| rs1534430   | 2   | T             | C            | 3.99E-14  | -0.00402779      | 0.000532667 | 0.389593 | -0.013021413   | 53.49135393  |
| rs1549142   | 19  | T             | C            | 3.9E-11   | 0.0040914        | 0.000619147 | 0.228817 | 0.011379782    | 47.90143993  |
| rs16903097  | 8   | G             | T            | 3.97E-09  | -0.00452308      | 0.00076851  | 0.130854 | -0.010135527   | 41.75522254  |
| rs17020110  | 1   | C             | T            | 2.07E-12  | 0.00413049       | 0.00058753  | 0.267645 | 0.012106639    | 50.99852815  |
| rs1790604   | 18  | G             | A            | 5.49E-10  | -0.00322907      | 0.000520432 | 0.536379 | -0.010684952   | 43.9947532   |
| rs2111485   | 2   | G             | A            | 7.84E-13  | 0.00380166       | 0.000530651 | 0.609397 | 0.012337158    | 51.98170601  |
| rs2123340   | 9   | A             | G            | 7.76E-12  | -0.00373671      | 0.000546057 | 0.651292 | -0.011784337   | 48.46869387  |
| rs221786    | 7   | C             | T            | 1.53E-09  | 0.00494967       | 0.000819327 | 0.886238 | 0.010403498    | 43.74871826  |
| rs229540    | 22  | G             | T            | 8.83E-22  | 0.00503721       | 0.000525234 | 0.423587 | 0.016514366    | 69.87760093  |
| rs2412974   | 22  | T             | C            | 8.01E-09  | -0.00311955      | 0.000540792 | 0.358692 | -0.009934      | 40.93316063  |
| rs244672    | 5   | T             | C            | 4.84E-09  | -0.00462791      | 0.000790748 | 0.877485 | -0.010078796   | 41.52383909  |
| rs2745803   | 20  | G             | A            | 9.31E-09  | -0.00368215      | 0.000641164 | 0.207698 | -0.009889971   | 40.75351359  |
| rs28157     | 5   | T             | G            | 4.16E-10  | -0.00349175      | 0.000558853 | 0.316822 | -0.010759803   | 44.29966708  |
| rs2823272   | 21  | A             | T            | 2.03E-10  | -0.00355403      | 0.000558859 | 0.31568  | -0.010951578   | 45.08067921  |
| rs28418426  | 6   | C             | T            | 3.06E-58  | 0.00917276       | 0.000570025 | 0.5296   | 0.027702778    | 118.5682421  |
| rs3184504   | 12  | C             | T            | 1.1E-81   | -0.0099309       | 0.000518629 | 0.517816 | -0.032959431   | 132.78234069 |
| rs3775291   | 4   | T             | C            | 1.05E-12  | -0.00403311      | 0.000566167 | 0.297729 | -0.012267237   | 50.43077767  |
| rs3850765   | 10  | C             | T            | 2.76E-09  | 0.00313025       | 0.000526496 | 0.585106 | 0.010238706    | 43.04856985  |
| rs4263621   | 6   | A             | G            | 1.48E-08  | 0.00295553       | 0.000521765 | 0.537567 | 0.009754919    | 40.99445163  |
| rs4276275   | 4   | T             | C            | 5.84E-11  | 0.00340427       | 0.000519895 | 0.472519 | 0.011276249    | 47.40666159  |
| rs4409785   | 11  | C             | T            | 4.31E-21  | 0.00647971       | 0.00068747  | 0.171755 | 0.016230374    | 68.65611266  |
| rs4444866   | 4   | T             | C            | 2.85E-08  | -0.00322868      | 0.000581693 | 0.278846 | -0.009558621   | 39.40104985  |
| rs60600003  | 7   | G             | T            | 7.19E-09  | 0.00500327       | 0.000864647 | 0.100946 | 0.009965003    | 41.88620376  |
| rs61759532  | 17  | T             | C            | 1.26E-11  | 0.00419164       | 0.000618829 | 0.246518 | 0.011664542    | 49.11423738  |
| rs62076510  | 17  | G             | T            | 3.46E-13  | 0.00520033       | 0.000714773 | 0.163945 | 0.01252889     | 52.79980126  |
| rs6426808   | 1   | A             | G            | 3.13E-10  | 0.00327227       | 0.000520025 | 0.509924 | 0.010836357    | 45.58891678  |
| rs654537    | 6   | A             | G            | 2.13E-29  | 0.00599281       | 0.000532298 | 0.611191 | 0.019385543    | 82.26664271  |
| rs6584277   | 10  | G             | A            | 8.79E-10  | -0.0031819       | 0.000519066 | 0.525655 | -0.01055659    | 44.67147922  |
| rs66749983  | 13  | T             | A            | 1.39E-10  | 0.00360186       | 0.000561314 | 0.310435 | 0.011050409    | 46.49950092  |
| rs6679677   | 1   | A             | C            | 1.07E-122 | 0.0201022        | 0.000852993 | 0.102573 | 0.040553153    | 175.8926969  |
| rs6833591   | 4   | G             | A            | 6.1E-09   | -0.00317388      | 0.000545888 | 0.347415 | -0.010012651   | 41.25403012  |
| rs683763    | 10  | T             | G            | 2.57E-08  | 0.00309064       | 0.000555044 | 0.321202 | 0.009589257    | 40.29152529  |
| rs6992869   | 8   | C             | T            | 2.56E-08  | 0.00299144       | 0.000537158 | 0.372952 | 0.009590521    | 40.29688695  |
| rs705702    | 12  | G             | A            | 1.96E-11  | 0.00367966       | 0.00054845  | 0.33759  | 0.011553819    | 48.64258483  |
| rs7090530   | 10  | A             | C            | 2.94E-15  | 0.00418704       | 0.000530431 | 0.603596 | 0.013593209    | 57.34691268  |
| rs71508903  | 10  | T             | C            | 3.21E-21  | 0.00625717       | 0.000661691 | 0.193712 | 0.016283548    | 68.88477083  |
| rs736374    | 11  | A             | G            | 2.48E-14  | 0.00412144       | 0.000540637 | 0.363007 | 0.013127732    | 55.35703964  |
| rs7441808   | 4   | G             | A            | 3.53E-10  | 0.00354074       | 0.000564386 | 0.302384 | 0.010803796    | 45.45043323  |
| rs7582694   | 2   | G             | C            | 2.61E-29  | -0.00697507      | 0.000620534 | 0.773961 | -0.01935466    | 79.01405081  |
| rs761357    | 6   | T             | A            | 6.81E-10  | 0.00331651       | 0.000537459 | 0.376767 | 0.010626625    | 44.69708909  |
| rs7649344   | 3   | C             | T            | 1.23E-08  | -0.00296836      | 0.000521217 | 0.458522 | -0.009807561   | 40.41722601  |
| rs7768019   | 6   | G             | C            | 1.31E-41  | -0.00812346      | 0.000601065 | 0.246831 | -0.023269439   | 94.63243256  |
| rs7905731   | 10  | C             | T            | 2.66E-09  | -0.00314417      | 0.000528315 | 0.594309 | -0.010248827   | 42.2172484   |
| rs8008961   | 14  | T             | C            | 5.54E-09  | -0.00336955      | 0.000577942 | 0.27975  | -0.010040369   | 41.36709618  |
| rs8043085   | 15  | T             | G            | 4.47E-12  | 0.00425081       | 0.000614119 | 0.233733 | 0.011919889    | 50.20236275  |
| rs8054578   | 16  | G             | A            | 8.95E-09  | -0.00358256      | 0.000623096 | 0.776427 | -0.009901503   | 40.80056821  |
| rs853303    | 8   | G             | A            | 2.3E-12   | -0.00374837      | 0.000534335 | 0.621756 | -0.012080393   | 49.67182751  |
| rs911760    | 9   | A             | C            | 5.1E-10   | 0.00418051       | 0.000672507 | 0.207503 | 0.010705119    | 45.03081629  |
| rs925489    | 9   | T             | C            | 1.52E-71  | 0.00985707       | 0.000550975 | 0.668458 | 0.030795965    | 132.2277799  |
| rs926103    | 1   | C             | T            | 4.92E-08  | -0.00298868      | 0.000547963 | 0.652112 | -0.009392754   | 38.72370048  |
| rs9272426   | 6   | G             | A            | 7.96E-121 | 0.0123738        | 0.000529183 | 0.460274 | 0.04023734     | 174.4654816  |
| rs9277569   | 6   | T             | C            | 1.36E-23  | 0.00840785       | 0.000839758 | 0.106947 | 0.0107240512   | 73.00406064  |
| rs933243    | 6   | A             | C            | 3.9E-24   | -0.00557022      | 0.000549604 | 0.33412  | -0.0174518     | 71.37900408  |
| rs9497965   | 6   | T             | C            | 5.19E-12  | 0.00364705       | 0.000528511 | 0.408708 | 0.011883406    | 50.04686039  |
| rs9815073   | 3   | A             | C            | 1.94E-35  | -0.00705726      | 0.000567968 | 0.347569 | -0.021394234   | 87.16606584  |
