# Supplementary material for: Hypothyroidism has a protective causal association with hepatocellular carcinoma: A two-sample Mendelian randomization study
Source: PubMed Central journal article supplement (PMC9562779; doi:10.3389/fendo.2022.987401), 2022-09-30
Supplement: DataSheet_6.pdf [file DataSheet_6.pdf]

**Table S3.** SNPs associated with FT4

| SNP         | chr | effect_allele | other_allele | P-value   | beta ( $\beta$ ) | se     | EAf     | R <sup>2</sup> | F.statistic |
|-------------|-----|---------------|--------------|-----------|------------------|--------|---------|----------------|-------------|
| rs10119187  | 9   | T             | C            | 4.11E-09  | -2.05E-05        | 0.0085 | 0.8118  | 0.026333511    | 111.0136653 |
| rs10759944  | 9   | A             | G            | 1.37E-29  | 3.27E-05         | 0.0068 | 0.2157  | -0.050883435   | 198.7466268 |
| rs10986291  | 9   | A             | T            | 2.06E-11  | 4.87E-05         | 0.0069 | 0.7152  | 0.030086878    | 127.3274906 |
| rs11626434  | 14  | C             | G            | 4.08E-17  | 3.17E-05         | 0.0069 | 0.3741  | 0.038038815    | 162.310764  |
| rs182416191 | 4   | A             | C            | 4.81E-24  | 5.05E-05         | 0.0114 | 0.03617 | 0.046649285    | 192.8774133 |
| rs2235544   | 1   | A             | C            | 4.20E-101 | -7.84E-05        | 0.0065 | 0.4432  | 0.095694586    | 434.3603082 |
| rs4842131   | 9   | T             | C            | 7.68E-44  | 2.00E-07         | 0.0075 | 0.5023  | -0.065179404   | 228.4362396 |
| rs4899764   | 14  | T             | G            | 5.41E-15  | 0.000120168      | 0.0068 | 0.3191  | -0.035291459   | 139.9216372 |
| rs56340915  | 3   | A             | G            | 2.71E-10  | 5.53E-05         | 0.01   | 0.90201 | 0.028416846    | 120.0532159 |
| rs6471863   | 8   | A             | G            | 1.09E-10  | 2.62E-07         | 0.0095 | 0.3288  | -0.028963918   | 115.5407153 |
| rs78677597  | 6   | A             | C            | 4.88E-19  | -4.22E-05        | 0.0082 | 0.8837  | -0.040295011   | 158.9910441 |
| rs9356988   | 6   | A             | G            | 3.56E-12  | -5.84E-06        | 0.0073 | 0.3901  | -0.031459675   | 125.1929515 |
